# Supplementary material
Source: Springer Nature journal article supplement (https://www.springermedizin.de/resource/supplementary/12916_2009_232_MOESM1_ESM.pdf/9599448)

# Implementation of kala-azar elimination 2006

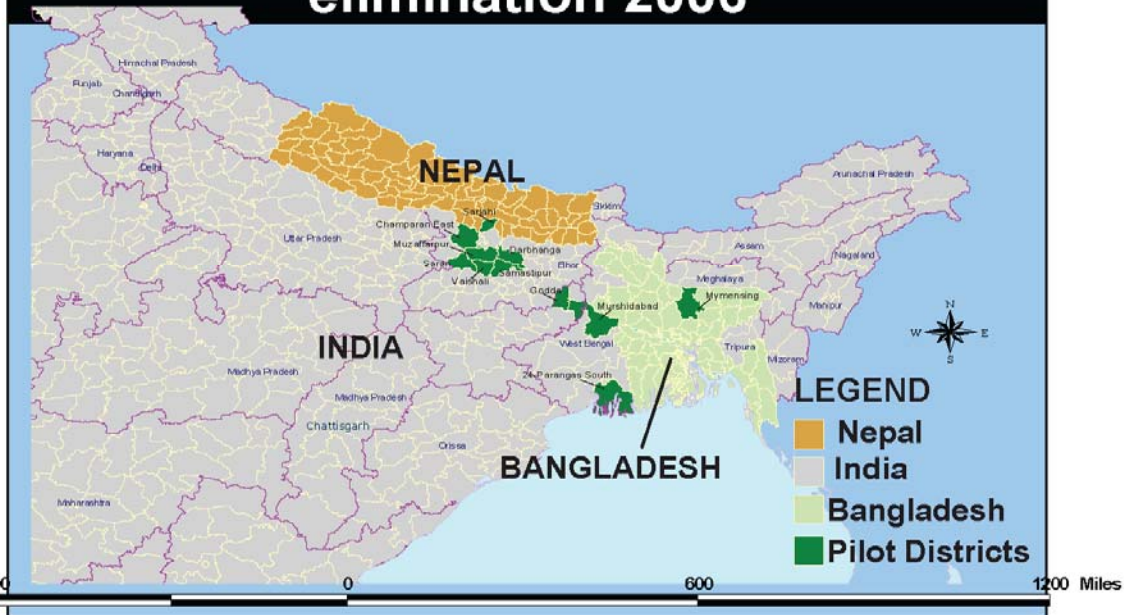

Supplement: MOESM1 [file 9599448]
